# Supplementary material for: Cold plasma gas loaded microbubbles as a novel ultrasound contrast agent
Source: Royal Society of Chemistry journal article supplement (doi:10.1039/c8nr08451c), 2018-12-11
Supplement: c8nr08451c1.pdf [file c8nr08451c1.pdf]

## Electronic Supplementary Information

### **Cold Plasma gas loaded microbubbles as a novel ultrasound contrast agent**

Feihong Dong<sup>a</sup>, Jiabin Zhang<sup>a</sup>, Kaile Wang<sup>a</sup>, Zhengxin Liu<sup>a</sup>, Jinsong Guo<sup>b</sup>, Jue Zhang<sup>\*a,b</sup>

a. Academy for Advanced Interdisciplinary Studies, Peking University, Beijing, China .

b. College of Engineering, Peking University, Beijing, China.

---

\*Corresponding Author: Jue Zhang, College of Engineering, Peking University, Beijing, China  
[zhangjue@pku.edu.cn](mailto:zhangjue@pku.edu.cn)

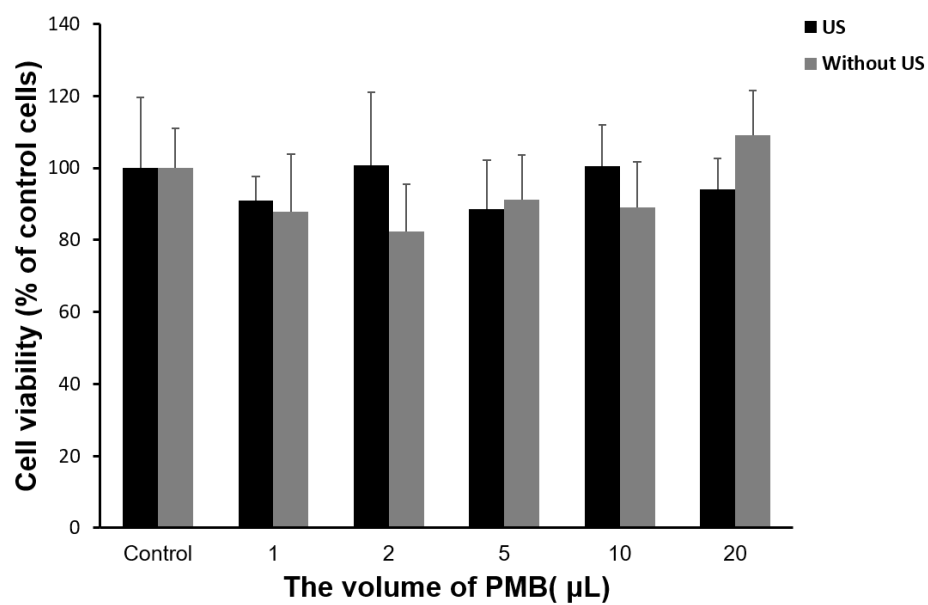

Figure. S1 Cytotoxicity of the perfluoropropane MBs on PIEC cells at various concentrations with and without ultrasound irradiation. Bars indicate average expression ( $\pm$ SD) of three replicates.
